# Supplementary material for: Overexpression of the Eucommia ulmoides Aquaporin, EuPIP1;1, Promotes Leaf Growth, Flowering and Bolting, and Stress Tolerance in Arabidopsis
Source: MDPI journal article supplement (doi:10.3390/ijms231911794), 2022-10-04
Supplement: s1 [file s1]

## Supplementary Materials

### 5'UTR

cgagcggggcgagcttgcttctggagtcttcaaataatagagagagaaaggctgaattctagagagagtgtgaag**ATG**GAGGGTAAG  
GAAGAGGATGTGAAGCTCGGAGCGAACAAATTTCCCGAGAGGCAGCCGTTGGGAACTGCGGCGCAGACG  
GACAAGGACTACAAGGAGCCACCGCCGGCGGGCCTGTTTCGAGCGGGAGGAGCTGACTTCATGGTCGTTTT  
ACAGGGCCGGAATCGCGGAGTTCATGGCGACTTTCTGTCTTGTACATCACGGTCTTGACGGTGATGGGT  
GTAAACAGAGCGCCGTCCAAGTGCGCCTCCGTCGGCATCCAAGGCATCGCTTGGGCCTTCGGCGGTATGAT  
CTTTGCCCTCGTCTACTGCACCGCCGGTATCTCAGGAGGACACATTAACCCGGCGGTGACCTTCGGTTTGT  
CCTGGCCAGAAAATATCGCTAACAGGGCGATCTTCTACATCGTGATGCAATGCCTTGGCGCAATTTGCGG  
TGCCGGCGTGGTGAAGGGGTTCCAACAGTCGGAATTCCAGATGACCGGTGGTGGAGCCAACTTTGTTGCC  
CCTGGCTACACCAAGGGTGACGGCCTCGGTGCGGAGATCGTCGGTACCTTTGTTCTTGTCTACACCGTTTTT  
TCCGCCACTGATGCCAAGAGAAGCGCCAGAGACTCTCATGTCCCTATTTGGCTCCTCTCCCATCGGGTTTG  
CGGTGTTCTTGGTCCATTTGGCGACAATCCCATCACTGGAACCGGCATCAACCCTGCCCGGAGTCTCGGAG  
CTGCCATCATTTACAATAAAGATCATGCCTGGGACGACCACTGGATATTCTGGGTTGGACCCCTATTGGAGC  
TGCGCTTGCTGCTTTATACCACCAGATAGTCATCCGAGCAATTCCTTTCAAGAG

### 3'UTR

CAGGGCT**TAA**aaaacccttattttcttcaagtcctttttcttttctttttatttggctctgttttcttctgtgtgtgtgctctgtga  
aattatgataattaggtttgtttgtattttaaggatgttgatgaatgaaatgaacaattattattgttaacaaaaaaaaaaaaaaaaaa  
aaaaaaaaaa polyA

**Figure S1.** Coding sequence of *EuPIP1;1*.

**Table S1.** The absorbance of OD(A260/A280) and OD(A260/A230) of the RNA.

| Sample                                                                                                                                                      | OD(A260/A280) | OD(A260/A230) |
|-------------------------------------------------------------------------------------------------------------------------------------------------------------|---------------|---------------|
| RNA extracted form Leaves of <i>E. ulmoides</i> PEG treatment for investigate the expression mode of <i>EuPIP1;1</i> in <i>E. ulmoides</i> under PEG stress |               |               |
| 0h 1                                                                                                                                                        | 1.92          | 2.51          |
| 0h 2                                                                                                                                                        | 1.97          | 2.09          |
| 0h 3                                                                                                                                                        | 1.93          | 1.98          |
| 1 h 1                                                                                                                                                       | 2.01          | 2.21          |
| 1 h 2                                                                                                                                                       | 1.96          | 2.23          |
| 1 h 3                                                                                                                                                       | 1.88          | 1.82          |
| 2 h 1                                                                                                                                                       | 2.0           | 2.34          |
| 2 h 2                                                                                                                                                       | 2.03          | 2.10          |
| 2 h 3                                                                                                                                                       | 1.91          | 1.80          |
| 4 h 1                                                                                                                                                       | 1.98          | 2.21          |
| 4 h 2                                                                                                                                                       | 1.91          | 1.75          |
| 4 h 3                                                                                                                                                       | 1.87          | 2.43          |
| 6 h 1                                                                                                                                                       | 2.05          | 2.45          |
| 6 h 2                                                                                                                                                       | 1.93          | 1.99          |
| 6 h 3                                                                                                                                                       | 1.84          | 1.89          |
| 24 h 1                                                                                                                                                      | 2.06          | 2.43          |
| 24 h 2                                                                                                                                                      | 1.96          | 2.01          |

|                                                                                                                                                       |      |      |
|-------------------------------------------------------------------------------------------------------------------------------------------------------|------|------|
| 24 h 3                                                                                                                                                | 1.95 | 2.51 |
| 48 h 1                                                                                                                                                | 1.97 | 2.52 |
| 48 h 2                                                                                                                                                | 1.96 | 1.91 |
| 48 h 3                                                                                                                                                | 1.90 | 1.93 |
| RNA extracted from <i>E. ulmoides</i> for tissue-specific expression                                                                                  |      |      |
| root1                                                                                                                                                 | 1.98 | 2.42 |
| root2                                                                                                                                                 | 1.85 | 2.23 |
| root3                                                                                                                                                 | 1.96 | 2.46 |
| stem1                                                                                                                                                 | 1.87 | 2.12 |
| stem2                                                                                                                                                 | 1.99 | 2.17 |
| stem3                                                                                                                                                 | 1.86 | 2.25 |
| leaf1                                                                                                                                                 | 2.01 | 2.28 |
| leaf2                                                                                                                                                 | 1.99 | 2.45 |
| leaf3                                                                                                                                                 | 1.87 | 2.23 |
| fruit1                                                                                                                                                | 1.88 | 2.25 |
| fruit2                                                                                                                                                | 1.92 | 2.41 |
| fruit3                                                                                                                                                | 1.99 | 2.3  |
| RNA extracted from leaves of <i>Arabidopsis</i> for analysis the expression level of growth-related genes and the expression level of <i>EuPIP1;1</i> |      |      |
| WT 1                                                                                                                                                  | 2.01 | 2.54 |
| WT 2                                                                                                                                                  | 1.85 | 1.92 |
| WT 3                                                                                                                                                  | 2.01 | 2.50 |
| P1 1                                                                                                                                                  | 2.01 | 2.46 |
| P1 2                                                                                                                                                  | 1.89 | 2.39 |
| P1 3                                                                                                                                                  | 1.99 | 2.38 |
| P2 1                                                                                                                                                  | 1.89 | 2.45 |
| P2 2                                                                                                                                                  | 1.94 | 2.42 |
| P2 3                                                                                                                                                  | 2.01 | 2.25 |
| RNA extracted from leaves of <i>Arabidopsis</i> for analysis the expression level of stress-related genes                                             |      |      |
| WT 1                                                                                                                                                  | 1.96 | 2.35 |
| WT 2                                                                                                                                                  | 2.01 | 2.45 |
| WT 3                                                                                                                                                  | 1.90 | 1.93 |
| P1 1                                                                                                                                                  | 1.94 | 2.23 |
| P1 2                                                                                                                                                  | 1.83 | 2.36 |
| P1 3                                                                                                                                                  | 2.0  | 1.98 |
| WT 1 (drought)                                                                                                                                        | 1.86 | 2.25 |
| WT 2 (drought)                                                                                                                                        | 1.93 | 2.11 |
| WT 3 (drought)                                                                                                                                        | 1.94 | 2.50 |
| P1 1 (drought)                                                                                                                                        | 1.98 | 2.28 |
| P1 2 (drought)                                                                                                                                        | 1.87 | 1.98 |
| P1 3 (drought)                                                                                                                                        | 1.91 | 2.34 |
| WT 1 (salt)                                                                                                                                           | 1.99 | 2.27 |

|             |      |      |
|-------------|------|------|
| WT 2 (salt) | 1.86 | 2.42 |
| WT 3 (salt) | 1.90 | 2.07 |
| P1 1 (salt) | 1.93 | 2.31 |
| P1 2 (salt) | 1.96 | 2.01 |
| P1 3 (salt) | 1.96 | 1.99 |

**Table S2.** Primers used in the study.

| Primer     | Gene ID   | Sequence 5' to 3'        | Purpose          |
|------------|-----------|--------------------------|------------------|
| EuPIP-GSP1 |           | GGTGGCTCCTTGTAGT         |                  |
| EuPIP-GSP2 |           | TGCGCCGCAGTTCCCAA        | 5'RACE           |
| EuPIP-GSP3 |           | TGCCTCTCGGGAAATTTG       |                  |
| EuPIPC3-1  |           | CCCCATCGGGTTTGCGGTGTTCTT | 3'RACE           |
| EuPIPC3-2  |           | CCGGAGTCTCGGAGCTGCCATCAT |                  |
| EuPIP-F    |           | GTCGAATTCTAGAGAGAG       | Full cDNA        |
| EuPIP-R    |           | TTTAAGCCCTGCTCTTGA       | sequence         |
| qEuPIP-F   |           | TCCAGATGACCGGTGGTG       | Realtime PCR     |
| qEuPIP-R   |           | AGTGGCGGAGAAAACGGT       |                  |
| EuActin-F  |           | TTGTTAGCAACTGGGATGATATGG | Realtime PCR     |
| EuActin-R  |           | CAGGGTGTTCCTTCAGGAGCAA   |                  |
| EuPIPJ-F   |           | TCCAGATGACCGGTGGTG       | Transgenic plant |
| EuPIPJ-R   |           | AGTGGCGGAGAAAACGGT       | detection        |
| AtACT2-F   | AT3G18780 | AAGTCTTGTTCCAGCCCTCG     | Realtime PCR     |
| AtACT2-R   |           | TCTGCTGGAATGTGCTGAGG     |                  |
| AtGIF2-F   | AT1G01160 | GATGCTTGGTGGGTCAGGAA     |                  |
| AtGIF2-R   |           | GCGCACTCAGCAAGTTTACC     |                  |
| AtKUP4-F   | AT4G23640 | TTACCCGTGTCTGGTGCTTC     |                  |
| AtKUP4-R   |           | TGACAATCGAGAACGTGGCA     |                  |
| AtLBD18-F  | AT2G45420 | TCCTCCCCCTCTTGCCATAA     |                  |
| AtLBD18-R  |           | CACCGTATTGGTGACGTGGA     |                  |
| AtPIF4-F   | AT2G43010 | CGGAGTTCAACCTCAGCAGT     |                  |
| AtPIF4-R   |           | CCATCGGCTGCATCTGAGTC     |                  |

---

|           |           |                        |
|-----------|-----------|------------------------|
| AtTCP14-F | AT3G47620 | TCCTTCTCATTTCCTCGCTCCG |
| AtTCP14-R |           | TAGGTGCACGTCCCTGTAGA   |
| AtP5CS1-F | AT2G39800 | ATCCCTGTGCTAGGTCATGC   |
| AtP5CS1-R |           | CTATGCGCTTTGCCATATCCG  |
| AtHKT1-F  | AT4G10310 | TCTTCTTGGAGTGACGGTGC   |
| AtHKT1-R  |           | TAGTTTCTCCGGTGTGTCCG   |
| AtSOS1-F  | AT2G01980 | TCATCTCCCGCCGCATTATC   |
| AtSOS1-R  |           | CTTGAGCTACGTGGTGGTGT   |
| AtCRY1-F  | AT4G08920 | TGCTGCGTTTTTGAGAGAGAT  |
| AtCRY1-R  |           | GCACTATCGGCTTTTCTGCG   |
| AtCRY2-F  | AT1G04400 | GATGCCAATAACTGCAGCGG   |
| AtCRY2-R  |           | GGCACACTGGAAAACGTGTC   |
| AtFCA-F   | AT4G16280 | AGCCTATGGGTCCTCACCAT   |
| AtFCA-R   |           | GAAGGAGGATACTTCGCGGG   |
| AtFT-F    | AT1G65480 | ATGTGTAGAGGGTTCATGCC   |
| AtFT-R    |           | TCCTGAGGTCTTCTCCACCAA  |

---
